# Supplementary material
Source: PubMed Central journal article supplement (PMC5000851)
Supplement: NIHMS811816-supplement-1.pdf [file NIHMS811816-supplement-1.pdf]

## Supplementary Online Content

Yeung EH, Sundaram R, Bell EM, et al. Examining infertility treatment and early childhood development in the Upstate KIDS Study. *JAMA Pediatr*. Published online January 4, 2016. doi:10.1001/jamapediatrics.2015.4164.

### **eTable.** ASQ Responses and Screening Fails in Upstate KIDS

This supplementary material has been provided by the authors to give readers additional information about their work.

**eTable. ASQ Responses and Screening Fails in Upstate KIDS**

| n (%)                   | Age of Screen |               |               |               |               |               |               |
|-------------------------|---------------|---------------|---------------|---------------|---------------|---------------|---------------|
|                         | 4-6†          | 8             | 12            | 18            | 24            | 30            | 36            |
| Response rate (of 4989) | 4739<br>(95%) | 3625<br>(73%) | 3092<br>(62%) | 2659<br>(53%) | 2356<br>(47%) | 2324<br>(47%) | 2121<br>(43%) |
| Screen invalid*         | 346<br>(7%)   | 384<br>(11%)  | 377<br>(12%)  | 433<br>(15%)  | 454<br>(19%)  | 564<br>(24%)  | 320<br>(15%)  |
| Absolute valid response | 4463<br>(93%) | 3239<br>(89%) | 2715<br>(88%) | 2226<br>(85%) | 1901<br>(81%) | 1795<br>(77%) | 1799<br>(85%) |
| Any domain fail**       | 382<br>(9%)   | 312<br>(10%)  | 262<br>(10%)  | 161<br>(7%)   | 194<br>(7%)   | 149<br>(8%)   | 111<br>(6%)   |
| Fine motor fail**       | 156<br>(4%)   | 80<br>(2%)    | 30<br>(1%)    | 64<br>(3%)    | 67<br>(2%)    | 58<br>(3%)    | 60<br>(3%)    |
| Gross motor fail**      | 143<br>(3%)   | 74<br>(2%)    | 128<br>(5%)   | 67<br>(3%)    | 57<br>(2%)    | 80<br>(4%)    | 41<br>(2%)    |
| Communication fail**    | 97<br>(2%)    | 131<br>(4%)   | 114<br>(5%)   | 71<br>(3%)    | 124<br>(4%)   | 83<br>(5%)    | 51<br>(3%)    |
| Personal-Social fail**  | 114<br>(3%)   | 130<br>(4%)   | 80<br>(3%)    | 69<br>(2%)    | 82<br>(3%)    | 56<br>(3%)    | 49<br>(3%)    |
| Problem Solving fail**  | 115<br>(3%)   | 62<br>(2%)    | 75<br>(3%)    | 70<br>(3%)    | 40<br>(1%)    | 73<br>(4%)    | 44<br>(2%)    |

\* Percentage out of total responses (counting responses from twin-pairs once by random selection of one of the twins)

\*\* Percentage out of valid responses

† n=213 children with first ASQ at 8-months.
